# Supplementary material
Source: PubMed Central journal article supplement (PMC5549830)
Supplement: Supp_Fig1.pdf [file Supp_Fig1.pdf]

## Supplementary Data

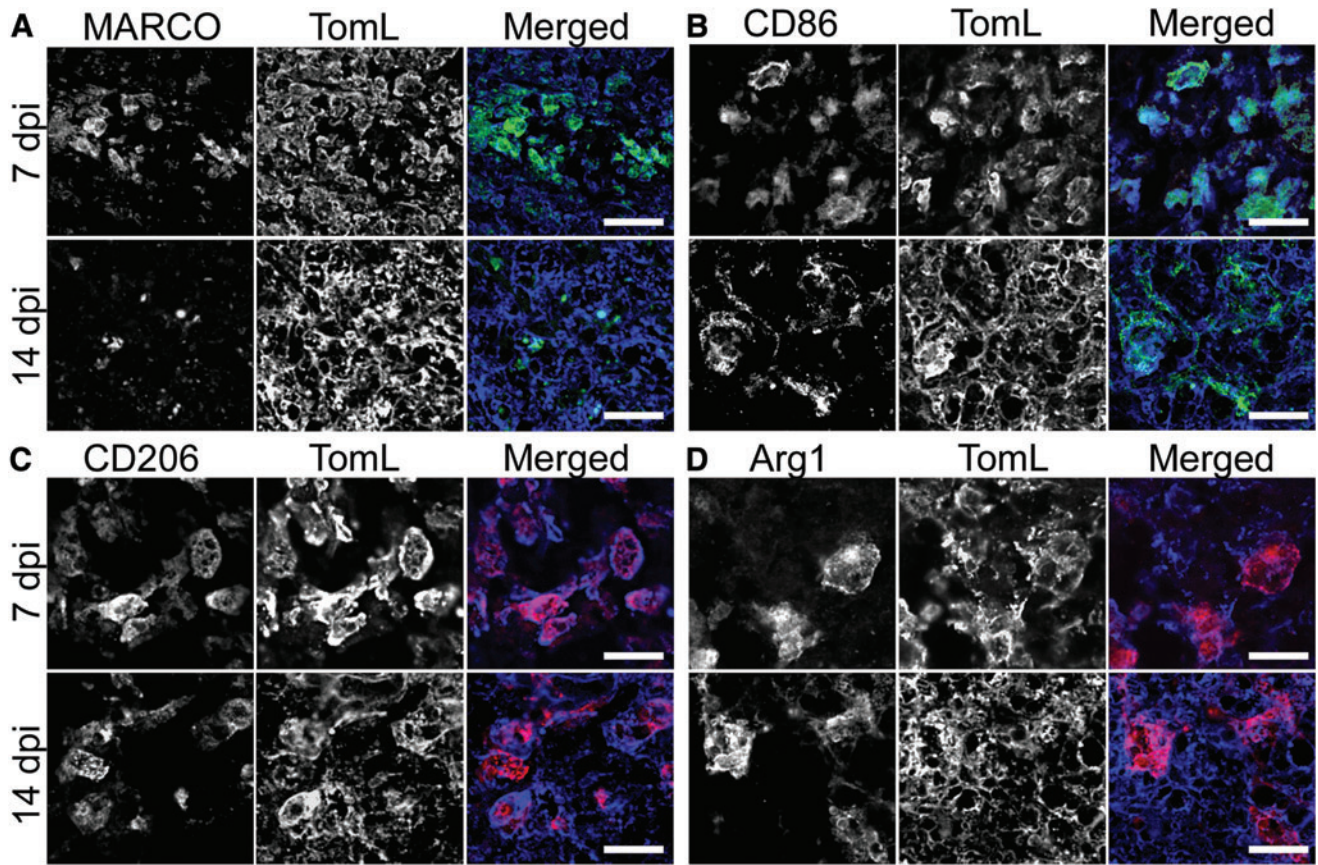

**SUPPLEMENTARY FIG. 1.** Representative images for analysis of macrophage phenotype at 7 dpi and 14 dpi. All images depict the epicenter of the injury from animals in the 50 kdyn 20 sec dwell group. **(A)** Macrophage receptor with collagenous structure (MARCO) (panel 1 and panel 3, green) and total tomato lectin (TomL) (panel 2 and panel 3, blue) positive cells at 7 dpi (top panels) compared with fractured, noncellular MARCO staining at 14 dpi (bottom panels). **(B)** CD86 (green) and TomL (blue) positive cells observed at both 7 and 14 dpi. **(C)** CD206 (red) and TomL (blue) positive cells observed at 7 and 14 dpi. **(D)** Arginase 1 (Arg 1) (red) and TomL (blue) positive cells observed at 7 and 14 dpi. Scale bars = 20 mm.
